1 **Cone-like rhodopsin expressed in the all cone retina of the colubrid pine snake as a**  
2 **potential adaptation to diurnality**

3

4 Nihar Bhattacharyya<sup>1</sup>, Benedict Darren<sup>1</sup>, Ryan K. Schott<sup>2</sup>, Vincent Tropepe<sup>1,3,4</sup> and  
5 Belinda S. W. Chang<sup>1,2,4\*</sup>

6

7 <sup>1</sup>Department of Cell & Systems Biology, University of Toronto, Toronto, Ontario,  
8 Canada

9 <sup>2</sup>Department of Ecology & Evolutionary Biology, University of Toronto, Toronto,  
10 Ontario, Canada

11 <sup>3</sup>Department of Ophthalmology & Vision Sciences, University of Toronto, Toronto ON,  
12 Canada M5T 3A9

13 <sup>4</sup>Centre for the Analysis of Genome Evolution and Function, University of Toronto,  
14 Toronto, Ontario, Canada

15

16 \*Correspondence:

17 Dr. Belinda Chang

18 Department of Cell and Systems Biology

19 Department of Ecology and Evolutionary Biology

20 University of Toronto

21 25 Harbord Street, Toronto, Ontario, M5S 3G5, Canada

22 T: (416)978-3507; E: [belinda.chang@utoronto.ca](mailto:belinda.chang@utoronto.ca)

23

24 **Running title (30/40 characters):** Snake rods adapt to diurnality

25 **Keywords (5/3-6):** rod and cone photoreceptors, photoreceptor transmutation, rhodopsin,  
26 visual pigments, visual evolution, reptile vision

27

28 Number of pages:

29 Number of tables:

30 Number of figures:

## 31 **Summary Statement**

32 The all cone retina of the colubrid snake, *Pituophis melanoleucus* contains a blue-shifted  
33 rhodopsin with cone opsin-like properties, which may have been adaptive in diurnal  
34 snakes.

35

## 36 **Abstract**

37 Colubridae is the largest and most diverse family of snakes, with visual systems that  
38 reflect this diversity, encompassing a variety of retinal photoreceptor organizations. The  
39 transmutation theory proposed by Walls postulates that photoreceptors could  
40 evolutionarily transition between cell types in squamates, but few studies have tested this  
41 theory. Recently, evidence for transmutation and rod-like machinery in an all cone retina  
42 has been identified in a diurnal garter snake (*Thamnophis*), and it appears that the  
43 rhodopsin gene at least may be widespread among colubrid snakes. However, functional  
44 evidence supporting transmutation beyond the existence of the rhodopsin gene remains  
45 rare. We examined the all cone retina of another diurnal colubrid, *Pituophis*  
46 *melanoleucus*, distantly related to *Thamnophis*. We found that *P. melanoleucus* expresses  
47 two cone opsins (SWS1, LWS) and rhodopsin (RH1) within the eye.  
48 Immunohistochemistry localized rhodopsin to the outer segment of photoreceptors in the  
49 all-cone retina of the snake and all opsin genes produced functional visual pigments when  
50 expressed *in vitro*. Consistent with other studies, we found that *P. melanoleucus*  
51 rhodopsin is extremely blue-shifted. Surprisingly, *P. melanoleucus* rhodopsin reacted  
52 with hydroxylamine, a typical cone opsin characteristic. These results support the idea  
53 that the rhodopsin-containing photoreceptors of *P. melanoleucus* are the products of  
54 evolutionary transmutation from rod ancestors, and suggests that this phenomenon may  
55 be widespread in colubrid snakes. We hypothesize that transmutation may be an  
56 adaptation for diurnal, brighter-light vision, which could result in increased spectral  
57 sensitivity and chromatic discrimination with the potential for colour vision.

58

## 59 **Introduction**

60 Reptiles are known for their impressive array of visual adaptations and retinal  
61 organizations, which reflect distinct ecologies and evolutionary histories (Walls, 1942).

62 The family Colubridae is the most speciose family of snakes and encompasses a diverse  
63 range of lifestyles and ecologies. Colubrid snakes have recently emerged as a compelling  
64 group in which to study visual system evolution and adaptation (Schott et al., 2016;  
65 Simões et al., 2015; Simões et al., 2016).

66 In the vertebrate retina, photoreceptor cells can be divided into two types based on  
67 their overall structure and function: cones, which are active in bright light and contain  
68 cone visual pigments (SWS1, SWS2, RH2, LWS) in a tapered outer segment, and rods,  
69 which function in dim light and contain rhodopsin (RH1) in a longer, more cylindrical  
70 outer segment (Bowmaker, 2008; Lamb, 2013; Walls, 1942). Reptilian retinas are unique  
71 in having multiple retinal configurations among closely related species including all-rod  
72 (Kojima et al., 1992), rod and cone (Sillman et al., 2001), and all-cone (Sillman et al.,  
73 1997). In 1942, physiologist Gordon Walls outlined his theory of transmutation to explain  
74 the evolutionary transformation of photoreceptors from one type to another (Walls,  
75 1942). This phenomenon has since been investigated in nocturnal geckos, where cone  
76 opsins are expressed in an all-rod retina in order to compensate for the evolutionary loss  
77 of RH1 in a hypothesized diurnal, all-cone ancestor (Kojima et al., 1992; Taniguchi et al.,  
78 1999). While the nocturnal henophedian snakes, such as boas and pythons, are known to  
79 have duplex retinas expressing RH1, LWS and SWS1 in canonical photoreceptors  
80 (Davies et al., 2009), the more derived diurnal colubrid snakes have been primarily  
81 shown to possess simplex retinas comprising of all cone photoreceptors, with the fate of  
82 the rod photoreceptor unknown (Caprette, 2005; Walls, 1942). Early studies of the  
83 colubrid visual system found a green-sensitive visual pigment in addition to a red and a  
84 blue pigment (Sillman et al., 1997) in the simplex retina, but were unable to distinguish  
85 between a spectrally shifted rhodopsin in a transmuted rod or a potentially resurrected  
86 RH2 cone opsin (Cortesi et al., 2015). More recently, a study from our group identified a  
87 functional blue-shifted RH1 pigment in the all-cone retina of the ribbon snake  
88 (*Thamnophis proximus*), and proposed that this resulted from a rod to cone evolutionary  
89 transmutation in colubrid snakes that may have allowed for enhanced spectral  
90 discrimination and even trichromatic colour vision (Schott et al., 2016). A recent study  
91 that sequenced the opsins of several other colubrid snake species discovered the  
92 widespread presence of full-length rhodopsin genes in species with supposed simplex

93 retinas that were previously presumed to have lost rod/rhodopsins (Simões et al., 2016).  
94 However, detailed characterizations of colubrid snake opsins and photoreceptors in the  
95 context of the theory of evolutionary transmutation still remain rare.

96 To further test the hypothesis of widespread transmutation in colubrid snakes, and  
97 its potential functional consequences, we examined the visual system of the Northern  
98 Pine Snake (*Pituophis melanoleucus*), a diurnal colubrid snake distantly related to *T.*  
99 *proximus*. *Pituophis melanoleucus* inhabits the eastern half of the United States and  
100 Canada (Stull, 1940) and spends relatively short intervals on the surface during the day to  
101 forage for prey such as small mammals and birds, and to create new burrows (Diller and  
102 Wallace, 1996; Himes, 2001). While *P. melanoleucus* has been found to possess an all-  
103 cone retina (Caprette, 2005), similar to previous diurnal colubrids snakes studied (Schott  
104 et al., 2016; Sillman et al., 1997), unlike other strongly diurnal colubrids such as the  
105 garter snake, *P. melanoleucus* is more secretive and is thought to spend a considerable  
106 amount of time burrowing (Gerald et al., 2006).

107 In this study, we investigate whether there is evidence of photoreceptor  
108 transmutation from rods into cones in the all-cone retina of *P. melanoleucus* via  
109 functional characterization, cellular localization, and molecular evolutionary analyses of  
110 its visual pigment (opsin) genes. We isolated three opsins genes from *P. melanoleucus*:  
111 SWS1, LWS and RH1. Immunohistochemistry of the retina localized rhodopsin (RH1)  
112 protein and rod transducin to the inner and outer segments of a small subset of  
113 photoreceptors, suggesting that *P. melanoleucus* supports the theory of rod-to-cone  
114 transmutation in diurnal colubrids. All three opsins were successfully expressed *in vitro*  
115 and displayed properties characteristic of fully functional visual pigments. Additionally,  
116 spectroscopic assays revealed that *P. melanoleucus* rhodopsin is sensitive to  
117 hydroxylamine, which is more typical of cone opsins and is suggestive of more cone-like  
118 functional properties. This study provides further evidence for a fascinating evolutionary  
119 transformation in the retinas of colubrid snakes, with implications for reptiles in general.

120

## 121 **Materials and Methods**

122 *Animals*

123 A Northern pine snake (*Pituophis melanoleucus melanoleucus*, adult) specimen and mice  
124 (*Mus musculus*, adult, CD1) were obtained from a licensed source as commissioned by  
125 the University Animal Care Committee (UACC). The specimen was sacrificed using an  
126 approved euthanasia protocol. The eyes were enucleated and preserved in RNAlater or  
127 4% paraformaldehyde.

128

#### 129 *Total RNA extraction and cDNA synthesis*

130 The dissected whole eye was homogenized with TRIzol, and total RNA was isolated  
131 using a phenol/chloroform extraction and ethanol precipitation. The first strand of  
132 complementary DNA (cDNA) was synthesized using SuperScript III Reverse  
133 Transcriptase (Invitrogen, Waltham, MA, USA) from RNA samples primed with a 3'  
134 oligo-dT and a 5' SMART primer, following the protocol outlined by the SMART cDNA  
135 Library Construction Kit (BD Biosciences, Franklin Lakes, NJ, USA). The second strand  
136 complement was synthesized by long-distance PCR following the same protocol.

137 Visual pigment genes were isolated using a degenerate PCR strategy. Degenerate  
138 primers based on an alignment of reptilian visual pigment sequences were used in  
139 attempts to amplify partial sequences of the LWS, SWS1 and RH1 opsin genes with a  
140 heminested strategy. GenomeWalker (Clontech, Mountain View, CA, USA) was  
141 additionally used to obtain full-length sequences (Supplementary Table S1). Extracted  
142 PCR products were ligated into the pJET1.2 blunt plasmid vector.

143

#### 144 *Phylogenetic analysis*

145 A representative set of vertebrate visual opsin sequences was obtained from Genbank.  
146 These sequences were combined with the three opsins genes sequenced from the pine  
147 snake and aligned using MUSCLE (Edgar, 2004). The poorly aligned 5' and 3' ends of the  
148 sequence were manually trimmed. Species list and accession numbers for all sequences  
149 used in the study are provided in Supplementary Table S2. In order to confirm the  
150 identities of the opsin genes from the pine snake, a gene tree was estimated using the  
151 resulting alignment in MrBayes 3 (Ronquist and Huelsenbeck, 2003) using reversible  
152 jump MCMC with a gamma rate parameter (nst=mixed, rates=gamma), which explores  
153 the parameter space for the nucleotide model and the phylogenetic tree simultaneously.

154 The analyses were run for five million generations with a 25% burn-in. Convergence was  
155 confirmed by checking that the standard deviations of split frequencies approached zero  
156 and that there was no obvious trend in the log likelihood plot.

157

### 158 *Protein expression*

159 Full-length opsins sequences (RH1, SWS1, and LWS) were amplified from pJET1.2  
160 vector using primers that added the *Bam*HI and *Eco*RI restriction sites to its 5' and 3'  
161 ends, respectively, and inserted into the p1D4-hrGFP II expression vector (Morrow and  
162 Chang, 2010). Expression vectors containing *P. melanoleucus* cone opsins and rhodopsin  
163 genes were transiently transfected into cultured HEK293T cells (ATCC CRL-11268)  
164 using Lipofectamine 2000 (Invitrogen, Waltham, MA, USA; 8  $\mu$ g of DNA per 10-cm  
165 plate) and harvested after 48 h. Visual pigments were regenerated with 11-*cis* retinal,  
166 generously provided by Dr. Rosalie Crouch (Medical University of South Carolina),  
167 solubilized in 1% dodecylmaltoside, and purified with the 1D4 monoclonal antibody  
168 (University of British Columbia #95-062, Lot #1017; Molday and MacKenzie, 1983)  
169 as previously described (Morrow and Chang, 2015; Morrow and Chang, 2010; Morrow  
170 et al., 2011). RH1 and SWS1 pigments were purified in sodium phosphate buffers and  
171 LWS was purified in HEPES buffers containing glycerol (as described in van Hazel et al.  
172 (2013)). The ultraviolet-visible absorption spectra of purified visual pigments were  
173 recorded using a Cary 4000 double beam spectrophotometer (Agilent, Santa Clara, CA,  
174 USA). Dark-light difference spectra were calculated by subtracting light-bleached  
175 absorbance spectra from respective dark spectra. Pigments were photoexcited with light  
176 from a fiber optic lamp (Dolan-Jenner, Boxborough, MA, USA) for 60 s at 25°C.  
177 Absorbance spectra for acid bleach and hydroxylamine assays were measured following  
178 incubation in hydrochloric acid (100mM) and hydroxylamine (NH<sub>2</sub>OH, 50mM),  
179 respectively. To estimate  $\lambda_{\text{max}}$ , the dark absorbance spectra were baseline corrected and  
180 fit to Govardovskii templates for A1 visual pigments (Govardovskii et al., 2000).

181

### 182 *Immunohistochemistry*

183 Fixation of pine snake eyes was conducted as previously described (Schott et al., 2016).  
184 Briefly, after enucleating *P. melanoleucus* eyes in the light, they were rinsed in PBS

185 (0.8% NaCl, 0.02% KCl, 0.144% NaHPO<sub>4</sub>, and 0.024% KH<sub>2</sub>PO<sub>4</sub>, pH 7.4), fixed  
186 overnight at 4°C in 4% paraformaldehyde, infiltrated with increasing concentrations of  
187 sucrose (5%, 13%, 18%, 22%, 30%) in PBS, and embedded in a 2:1 solution of 30%  
188 sucrose and O.C.T compound (Tissue-Tek, Burlington, NC, USA) at -20°. The eyes were  
189 cryosectioned transversely at -25°C in 20 µm sections using a Leica CM3050 (Wetzlar,  
190 Germany) cryostat, placed onto positively charged microscope slides, and stored at -80°C  
191 until use.

192 Slides were first rehydrated in PBS and then air-dried to ensure adhesion. Sections  
193 were rinsed three times in PBS with 0.1% Tween-20 (PBT) and then incubated in 4%  
194 paraformaldehyde PBS for 20 minutes. After rinsing in PBT and PDT (PBT with 0.1%  
195 DMSO), the slides were incubated in a humidity chamber with blocking solution (1%  
196 BSA in PDT with 2% normal goat serum) for one hour, incubated with primary antibody  
197 diluted in blocking solution overnight at 4° in a humidity chamber. Antibodies used were  
198 the K20 antibody (Santa Cruz Biotechnology, Santa Cruz, CA, USA, sc-389, lot#:C1909,  
199 dilution: 1:500) and RET-P1 anti-rhodopsin antibody (Sigma-Aldrich, St. Louis, MO,  
200 USA, O-4886, lot#: 19H4839, dilution: 1:200).

201 After extensive rinsing and soaking in PDT (3 times for 15 minutes), secondary  
202 antibody was added to the samples and incubated at 37° for one hour in a humidity  
203 chamber. Secondary antibodies used for the fluorescent staining were the AlexaFluor-488  
204 anti-rabbit antibody (Life Technologies, Waltham, MA, USA, A11034, lot#: 1298480,  
205 dilution: 1:1000) and the Cy-3 anti-mouse antibody (Jackson ImmunoResearch, West  
206 Grove, PA, USA, 115-165-003, dilution: 1:800). After rinsing with PBS, followed by  
207 PDT, sections were stained with 10 µg/mL Hoescht for 10 minutes at room temperature.  
208 The sections were then rinsed in PBS and PDT and mounted with ProLong® Gold  
209 antifade reagent (Life technologies, Waltham, MA, USA) and coverslipped. Sections  
210 were visualized via a Leica SP-8 confocal laser microscope (Wetzlar, Germany).

211

## 212 **Results**

213 *Full-length RHI, SWS1 and LWS opsin sequences found in Pituophis melanoleucus*

214 *cDNA*



215 To determine the identities of the visual pigments in *P. melanoleucus*, eye cDNA and  
216 gDNA was screened for opsin genes. Three full-length opsins were amplified, sequenced,  
217 and analyzed phylogenetically with a set of representative vertebrate visual opsins (Table  
218 S1) using Bayesian inference (MrBayes 3.0) (Ronquist and Huelsenbeck, 2003). This  
219 analysis confirmed the identity of the three opsin genes as RH1, LWS, and SWS1 (Fig.  
220 S1-S3).

221 All three opsin genes sequence contained the critical amino acid residues required  
222 for proper structure and function of a prototypical opsin including K296, the site of the  
223 Schiff base linkage with 11-*cis* retinal (Palczewski et al., 2000; Sakmar et al., 2002), and  
224 E113, the counter-ion to the Schiff base in the dark state (Sakmar et al., 1989), as well as  
225 C110 and C187, which form a critical disulfide bond in the protein (Karnik and Khorana,  
226 1990). Both cone opsin genes also have the conserved P189 residue which is critical for  
227 faster cone opsin pigment regeneration (Kuwayama et al., 2002).

228 Interestingly, *P. melanoleucus* RH1 has serine at site 185 instead of the highly  
229 conserved cysteine, similar to several other snakes (Schott et al., 2016; Simões et al.,  
230 2016). Mutations at site 185 have been shown to reduce both visual pigment stability  
231 (McKibbin et al., 2007) and transducin activation *in vitro* (Karnik et al., 1988). Also, the  
232 *P. melanoleucus* RH1 has N83 and S292, which are often found in rhodopsins with blue-  
233 shifted  $\lambda_{\max}$  values, and can also affect all-*trans* retinal release kinetics following  
234 photoactivation (Bickelmann et al., 2012; van Hazel et al., 2016).

235 Based on known spectral tuning sites in LWS, *P. melanoleucus* has A285,  
236 compared to T285 in *Thamnophis* snakes. T285A is known to blue-shift the LWS  
237 pigment by 16-20 nm (Asenjo et al., 1994; Yokoyama, 2000). This suggests that the *P.*  
238 *melanoleucus* LWS may be considerably blue-shifted relative to the LWS pigment in  
239 *Thamnophis* snakes. Within *P. melanoleucus* SWS1, the phenylalanine at site 86 suggests  
240 that the pigment will be absorbing in the UV, as is typical of reptilian SWS1 pigments  
241 (Hauser et al., 2014). *Pituophis melanoleucus* SWS1, as well as other colubrids SWS1  
242 (Simões et al., 2016), have hydrophobic residues at two spectral tuning sites, A90 and  
243 V93. These sites are usually have polar or charged amino acid side chains (Carvalho et  
244 al., 2011; Hauser et al., 2014). These functional significance of these hydrophobic



245 residues have yet to be characterized, and suggests that caution should be taken in  
246 applying spectral tuning predictions on squamates SWS1 pigments.

247

### 248 *Immunohistochemistry*

249 Because *P. melanoleucus* has an all-cone retina, we used immunohistochemistry  
250 to determine if both rhodopsin and the rod G protein transducin are expressed in cone  
251 photoreceptors. We performed fluorescent immunohistochemistry on the transverse  
252 cryosections of the retina of *P. melanoleucus* with the rhodopsin antibody (RET-P1) and  
253 a rod-specific transducin antibody (K20). Both antibodies have been previously shown to  
254 be selective across a range of vertebrates (Fekete and Barnstable, 1983; Hicks and  
255 Barnstable, 1987; Osborne et al., 1999; Schott et al., 2016). We also used these antibodies  
256 on a CD1 mouse retina, following similar preparation, as a positive control.

257 Our results showed rhodopsin localized to the outer segments of select  
258 photoreceptors of the *P. melanoleucus* retina (red, Fig 1D), whereas the rod transducin  
259 localized to the inner segment (green, Fig 1E). The small amount of colocalization  
260 between rhodopsin and transducin in the inner segment (yellow, Fig 1F) is expected as  
261 the animal wasn't dark-adapted prior to sacrifice, as rod transducin translocates to the  
262 inner segment when exposed to bright light (Calvert et al., 2006; Elias et al., 2004). This  
263 pattern is consistent with rhodopsin and transducin staining in the *T. proximus* retina  
264 (Schott et al., 2016) and the previously unexplained results of rhodopsin detected in the  
265 retina of *T. sirtalis* (Sillman et al., 1997).

266 As expected, CD1 mouse retina had strong rhodopsin fluorescence (red, Fig 1A)  
267 in the outer segment and strong rod transducin staining (green, Fig 1B) in the inner  
268 segment, consistent with the rod dominant mouse retina. The lack of colocalization is  
269 consistent with a light-adapted retina (Calvert et al., 2006; Elias et al., 2004) (Fig 1C).

270

### 271 *In vitro expression*

272 Complete coding sequences of the *P. melanoleucus* RH1, LWS, and SWS1 opsins  
273 were cloned into the p1D4-hrGFP II expression vector (Morrow and Chang, 2010).  
274 Expression vectors were then transfected into HEK293T cells and the expressed protein  
275 was purified with the 1D4 monoclonal antibody (Morrow and Chang, 2015; Morrow et

276 al., 2011). Bovine wildtype rhodopsin was used as a control (Fig 2A). Pine snake  
277 rhodopsin has a  $\lambda_{\max}$  of 481nm (Fig 2B) which is similar to the measured  $\lambda_{\max}$  of  
278 rhodopsins from *T. proximus*, *T. sirtalis*, and *Arizona elegans* snakes (Schott et al., 2016;  
279 Sillman et al., 1997; Simões et al., 2016). The drastic blue shift is expected given the  
280 presence of the blue-shifting N83 and S292 amino acid identities (Bickelmann et al.,  
281 2012; Dungan et al., 2016; van Hazel et al., 2016). *P. melanoleucus* rhodopsin expressed  
282 similar to that of *T. proximus*, with a large ratio between total purified protein  
283 (absorbance at 280nm) and active protein (absorbance at  $\lambda_{\max}$ ) that indicates that only a  
284 small proportion of the translated opsin protein is able to bind chromophore and become  
285 functionally active. One possible explanation for this effect is the S185 residue in *P.*  
286 *melanoleucus* rhodopsin, as mutations at this site have been shown to affect the retinal  
287 binding efficiency of rhodopsin pigments expressed *in vitro* (McKibbin et al., 2007).

288 Expression of pine snake SWS1 showed a much more favorable 280nm to  $\lambda_{\max}$   
289 ratio (Fig 2C). We found that *P. melanoleucus* SWS1 pigment absorbs in the UV range  
290 with a  $\lambda_{\max}$  of 370nm, similar to the SWS1  $\lambda_{\max}$  of *Lampropeltis getula*, *Rhinocheilus*  
291 *lecontei*, and *Hypsiglena torquata* (Simões et al., 2016) all of which have the most red-  
292 shifted UV SWS measured among colubrid snakes.

293 Similar to the SWS1 expression, LWS also expressed quite well (Fig 2D). Fit to  
294 A1 templates gave a  $\lambda_{\max}$  of 534nm, which is blue-shifted relative to *Thamnophis* (Schott  
295 et al., 2016; Sillman et al., 1997), but identical with LWS MSP measurements of *H.*  
296 *torquata* (Simões et al., 2016) and very close to those of *L. getula*, *A. elegans*, and *R.*  
297 *lecontei* (Simões et al., 2016).

298

### 299 *Opsin protein functional characterization*

300 In order to confirm the covalent attachment of the chromophore in *P.*  
301 *melanoleucus* SWS1 pigments, the purified opsin was acid bleached (Fig 2C). We found  
302 a shift of the  $\lambda_{\max}$  from 370nm to 440nm, which indicates the presence of 11-*cis* retinal  
303 covalently bound by a protonated Schiff base to a denatured opsin protein (Kito et al.,  
304 1968), suggesting that the UV sensitivity of the pigment may be established by only the  
305 presence of F86.

306 *P. melanoleucus* LWS (Fig 3A) and RH1 (Fig 3B) were tested for hydroxylamine  
307 reactivity, which assesses the accessibility of the chromophore-binding pocket to attack  
308 by small molecules. If hydroxylamine can enter the binding pocket, it will hydrolyze the  
309 Schiff base linkage, resulting in an absorbance decrease of the dark peak and the increase  
310 of a retinal oxime peak at 363nm. Rhodopsins are thought to be largely non-reactive in  
311 the presence of hydroxylamine (Dartnall, 1968) (Fig 3C) due to their highly structured  
312 and tightly packed chromophore binding pockets relative to cone opsins, which often  
313 react when incubated in hydroxylamine (van Hazel et al., 2013). *P. melanoleucus* LWS  
314 reacted to hydroxylamine, as expected, with a  $t_{1/2}$  of ~3.9 min (Fig 3A), a time within the  
315 range of cone opsins (Das et al., 2004; Ma et al., 2001). As the  $\lambda_{\max}$  of *P. melanoleucus*  
316 SWS1 is 370nm, it was not tested as we would not be able to distinguish the retinal  
317 oxime peak from the  $\lambda_{\max}$  peak. Interestingly, *P. melanoleucus* rhodopsin also reacted to  
318 hydroxylamine with a  $t_{1/2}$  of ~14 min (Fig 3B), unlike the bovine rhodopsin control that  
319 did not react (Fig 3C). This implies that the chromophore binding pocket of *P.*  
320 *melanoleucus* rhodopsin has a more open configuration relative to other rhodopsin  
321 proteins, a property more typical of cone opsins.

322

## 323 **Discussion**

324 Recently, there has been mounting evidence supporting the theory of  
325 transmutation in photoreceptor evolution, proposed by Walls in 1942, which outlines the  
326 evolutionary transformation of one photoreceptor type into another in reptilian retinas.  
327 Evidence of cone to rod transmutation in nocturnal geckos has been extensively  
328 demonstrated using both cellular and molecular techniques (Crescitelli, 1956; Dodt and  
329 Walther, 1958; Kojima et al., 1992; McDevitt et al., 1993; Röhl, 2001; Sakami et al.,  
330 2014; Tansley, 1959; Tansley, 1961; Tansley, 1964; Zhang et al., 2006), while evidence  
331 of rod-to-cone transmutation in colubrid snakes remains somewhat sparse (Schott et al.,  
332 2016). In order to demonstrate rod-to-cone transmutation in the retina, there needs to be  
333 evidence of a functional rod machinery in a photoreceptor with some rod-like features in  
334 a retina which appears, superficially, to consist of only cones. Certainly, the presence of  
335 RH1 genes and MSP data suggests transmutation has occurred in several colubrid species  
336 (Hart et al., 2012; Sillman et al., 1997; Simões et al., 2015; Simões et al., 2016), but

337 further investigation is required in order to firmly state transmutation is present in the  
338 retinas of these colubrid snakes as there are multiple alternate explanations possible (RH1  
339 in the genome but not expressed, rhodopsin expressed but not functional, a cone cell co-  
340 opting rhodopsin etc). There is only one colubrid snake species for which cellular and  
341 molecular evidence for transmutation has been reported, *Thamnophis proximus* (Schott et  
342 al., 2016).

343 This study provides strong evidence that supports the hypothesis that  
344 photoreceptor transmutation has occurred in the retina of *P. melanoleucus*. As *P.*  
345 *melanoleucus* is not closely related to snakes in the genus *Thamnophis*, this suggests that  
346 transmutation may be widespread in colubrid snakes. However, the functional  
347 significance of transmutation in colubrid snakes still has not been established. In geckos,  
348 the advantage of cone-to-rod transmutation is more straightforward as these nocturnal  
349 animals are most likely compensating for the loss of RH1 in their diurnal ancestor. We  
350 propose that transmutation in colubrids may have occurred as an adaptation to diurnality  
351 that provided *P. melanoleucus* with a cone-like rod photoreceptor that operates at brighter  
352 light levels, perhaps as a compensation for the loss of the RH2 cone opsins. Our finding  
353 of a highly blue-shifted rhodopsin with more cone-like functional properties, as indicated  
354 by hydroxylamine reactivity, support this hypothesis.

355 *Pituophis melanoleucus* rhodopsin shows hydroxylamine reactivity, a canonical  
356 cone opsin property (Wald et al., 1955). With a reaction half-life of ~14min, the *P.*  
357 *melanoleucus* rhodopsin reacts much quicker and closer to cone opsin speeds (Das et al.,  
358 2004; Ma et al., 2001) than previous rhodopsins that have reacted when incubated in  
359 hydroxylamine, like the echidna (Bickelmann et al., 2012) and the anole (Kawamura and  
360 Yokoyama, 1998) which react over hours. The RH1 sequence contains both E122 and  
361 I189, which are known to mediate the slower decay and regeneration kinetics typical of  
362 rhodopsin (Imai et al., 1997; Kuwayama et al., 2002). Conversely, the presence of serine  
363 rather than cysteine at site 185, in rhodopsin has been shown to activate fewer G proteins  
364 (Karnik et al., 1988) and mutation at site 185 has been shown to reduce the thermal  
365 stability of the protein (McKibbin et al., 2007), both characteristics being more typical of  
366 cone opsins. Cones have been optimized for fast regeneration, with cone opsin meta-  
367 intermediate states being short lived compared to rhodopsin (Imai et al., 2005), and a

368 cone-specific Müller cell retinoid cycle (Das et al., 1992) providing a dedicated pool of  
369 11-*cis* retinal. These faster kinetic properties are hypothesized to be facilitated in cone  
370 opsins via the relative “openness” of the chromophore binding pocket, which allows  
371 water molecules, and therefore other small molecules like hydroxylamine, to access the  
372 chromophore where they can participate Schiff base hydrolysis (Chen et al., 2012;  
373 Piechnick et al., 2012; Wald et al., 1955). Rhodopsins, on the other hand, are optimized  
374 for sensitivity and signal amplification; therefore, E122/I189 and a tighter overall  
375 structure contribute to a slower active state decay allowing for the activation of multiple  
376 G proteins (Chen et al., 2012; Starace and Knox, 1997), increased thermal stability  
377 relative to cone opsins (Barlow, 1964), and a resistance to hydroxylamine (Dartnall,  
378 1968). *Pituophis melanoleucus* rhodopsin shows adaptations to decrease the number of  
379 G-proteins activated, and hydroxylamine reactivity which suggests that an open  
380 chromophore binding pocket would enable water access to facilitate active state decay,  
381 Schiff base linkage hydrolysis, and retinal regeneration (Chen et al., 2012) rates similar to  
382 cone opsins. Spectroscopic assays measuring G protein activation and retinal release rates  
383 have never been performed on colubrid rhodopsins, but would be an interesting direction  
384 for future research characterizing this cone opsin-like rhodopsin.

385 Retinal immunohistochemistry localized *P. melanoleucus* rhodopsin protein in the  
386 outer segment of a photoreceptor, as well as the presence of rod transducin in the inner  
387 segment. Rod and cone transducin are thought to originate via duplication from an  
388 ancestral gene (Larhammar et al., 2009) and both have been shown to function with all  
389 opsins (Sakurai et al., 2007), therefore the presence and preservation of rod transducin in  
390 the photoreceptor supports the theory that this is indeed a transmuted rod and not a cone  
391 photoreceptor co-opting rhodopsin expression. Because the retinas were not dark adapted  
392 prior to sacrifice, we can presume that under normal photopic light conditions, *P.*  
393 *melanoleucus* rod transducin is cycled out of the outer segment of the cone-like rod, a  
394 distinct rod property (Chen et al., 2007; Rosenzweig et al., 2007). In the light, rods cycle  
395 transducin and recoverin out of the outer segment, and arrestin into it (Calvert et al.,  
396 2006). This allows the rod to effectively shut down phototransduction under bleaching  
397 conditions to prevent damage to the photoreceptor. Cones generally do not cycle  
398 transducin out of the outer segment of the photoreceptor under normal light conditions

399 (Chen et al., 2007). This suggests that the rhodopsin-expressing photoreceptors in the  
400 retina of *P. melanoleucus* would not be able to generate a photoresponse in normal  
401 daylight, and thus if this cone-like rod is participating in colour vision with the canonical  
402 cones in the retina, it would likely only be under mesopic light conditions where both  
403 photoreceptor cell types can be active.

404 Our microscopy results of the *P. melanoleucus* retina additionally revealed a  
405 cone-like rod which still looks distinct in comparison to the other cones. The cone-like  
406 rod outer segment and inner segment had similar diameters with a relatively long outer  
407 segment, while the surrounding cones had distinctly large ellipsoids in the inner segment,  
408 and proportionally smaller outer segments. Rod photoreceptor morphology is also  
409 generally specialized to maximize sensitivity with long cylindrical outer segments (Lamb,  
410 2013). Cone morphological specializations, however, are thought to enable selective  
411 colour vision, a faster phototransduction and visual pigment regeneration, while also  
412 minimizing metabolic load by miniaturizing the overall structures with large ellipsoids  
413 that tunnel light onto smaller tapered outer segments (Harosi and Novales Flamarique,  
414 2012). Previous EM studies on the retina of *T. proximus* showed that the membrane discs  
415 unique to rods in the outer segment are still present in the transmuted photoreceptor  
416 (Schott et al., 2016). Interestingly, a reduction of RH1 expression levels has been shown  
417 to reduce the size of the outer segment of rods, in addition to lowering the  
418 photosensitivity and altering the kinetics of the cell to be more cone-like (Makino et al.,  
419 2012; Rakshit and Park, 2015; Wen et al., 2009). Currently, the relative expression levels  
420 of RH1 in the retinas of colubrid snakes have not been measured. There are additional  
421 specializations in the synaptic structures that reflect the different priorities in rod and  
422 cone function (Lamb, 2013), but the synaptic structure of the cone-like rod also remains  
423 uninvestigated.

424 Results from this study suggest that transmutation is modifying the function of a  
425 subset of photoreceptors in the retina of *P. melanoleucus*. These modifications may serve  
426 to lower the sensitivity and signal amplification of the photoreceptor, supporting the  
427 hypothesis of a more cone-like function. However, the type of signal these transmuted  
428 rods send to the brain is still unknown. Rods and cones are known to have distinct ERG  
429 responses, but *T. sirtalis* is the only colubrid snake with ERG measurements performed at



430 a variety of light levels (Jacobs et al., 1992). However, this study did not record any  
431 scotopic (rod) response, nor did it record any photopic response from the SWS1-type  
432 photoreceptors, which suggests that the results of the study may be incomplete or that the  
433 scotopic pathways in the colubrid eye have degraded. Indeed, in high scotopic and  
434 mesopic light levels, mammalian rod photoreceptors can and do use cone pathways (Kolb  
435 et al.). The presence of rod bipolar cells and AII amacrine cells, both of which are  
436 required in the rod-specific photoresponse pathway (Lamb, 2013), has never been  
437 established in the colubrid retina..

438 Transmutation may be an attempt to compensate for the loss of the RH2 cone  
439 opsin and the lack of spectral overlap between the LWS and SWS1 pigment, such that the  
440 rod photoreceptor may have evolved cone-like functionality such that it could participate  
441 in colour vision. In addition to the molecular modifications to *P. melanoleucus* rhodopsin  
442 and the physiological modifications to the rod cell, the extreme blue-shift of the RH1  
443  $\lambda_{\max}$ , which is quite rare for terrestrial rhodopsins, may itself be an adaptation for colour  
444 vision, as a  $\lambda_{\max}$  of ~480 nm is in the range of typical RH2 pigments (Lamb, 2013).  
445 *Pituophis melanoleucus*, in comparison to the *Thamnophis* genera (Schott et al., 2016;  
446 Sillman et al., 1997), has a narrower overall range of spectral sensitivities. There could be  
447 two possible reasons for this narrowing. It could be that this narrowing of the spectral  
448 ranges is to facilitate spectral overlap as an adaptation in *P. melanoleucus*. Or the  
449 narrowing of the spectral range may simply be due to phylogenetic history, as *P.*  
450 *melanoleucus* LWS and SWS1 absorb at similar wavelengths to its closest relatives  
451 (Simões et al., 2016), which in turn could be an adaptation, but not one due to the specific  
452 visual environment of *P. melanoleucus*. Trichromatic vision would be greatly  
453 advantageous for a diurnal species (Ankel-Simons and Rasmussen, 2008; Heesy and  
454 Ross, 2001), and perhaps sacrificing scotopic vision in order to achieve better mesopic  
455 and photopic vision is possible, since other snake sensory systems adaptations, such as  
456 chemoreception, could be sufficient in dim light environments (Drummond, 1985).  
457 However, currently there is a lack of behavioral studies investigating trichromatic colour  
458 discrimination in colubrid snakes under mesopic light conditions.

459 We hypothesize that rod-to-cone transmutation may be allowing colubrid snakes  
460 to have a third cone-like photoreceptor, allowing for spectral sensitivity between SWS1



461 and LWS, possibly also trichromatic colour perception in mesopic light conditions. The  
462 loss of RH1 in nocturnal geckos and the resulting transmutation of cone into rod  
463 demonstrate that the visual system of squamates is capable of adapting to compensate for  
464 previous functionality loss in different photoreceptor types. In colubrid snakes, and  
465 possibly squamates in general, the rod/cone photoreceptor binary is not as distinct as it is  
466 in other vertebrates and caution should be taken in classifying rod or cone photoreceptors  
467 based on limited characterization.

468 In summary, we find that *P. melanoleucus*, like *T. proximus*, has an all-cone retina  
469 derived through evolutionary transmutation of the rod photoreceptors. Furthermore, *P.*  
470 *melanoleucus* rhodopsin is the first vertebrate rhodopsin to show hydroxylamine  
471 reactivity similar to cone opsins. This study is also the first to demonstrate the functional  
472 effects of transmutation in the retina of colubrid snakes. We suggest that transmutation in  
473 colubrid snakes is an adaptation to diurnality and is compensating for the loss of RH2 by  
474 establishing spectral sensitivity in a range where the existing SWS1 and LWS are not  
475 sensitive, and possibly establishing trichromatic colour vision. Perhaps transmutation in  
476 colubrid snakes may have contributed to the widespread success of the snake family  
477 across such a vast range of ecologies and lifestyle. Ultimately, future work investigating  
478 the functional effects of transmutation, from behavioral to molecular, will reveal the  
479 significance of rod-to-cone transmutation in colubrid snakes.

480

#### 481 **Competing interests**

482 The authors declare no competing or financial interests

483

#### 484 **Author contributions**

485 N.B and B.S.W.C contributed to the conceptual design. V.T. provided mice and  
486 experimental advice. N.B. and B.D. performed the research, and N.B., R.K.S, and  
487 B.S.W.C analyzed data. N.B., R.K.S and B.S.W.C wrote the manuscript.

488

#### 489 **Funding**

490 This work was supported by a National Sciences and Engineering Research Council  
491 (NSERC) Discovery Grant (To B.S.W.C), a Vision Science Research Program  
492 Scholarship (to N.B. and R.K.S), and an Ontario Graduate Scholarship (to R.K.S).

493

#### 494 **References**

- 495 **Ankel-Simons, F. and Rasmussen, D. T.** (2008). Diurnality, nocturnality, and the  
496 evolution of primate visual systems. *Am. J. Phys. Anthropol.* **137**, 100–117.
- 497 **Asenjo, A. B., Rim, J. and Oprian, D. D.** (1994). Molecular determinants of human  
498 red/green color discrimination. *Neuron* **12**, 1131–1138.
- 499 **Barlow, H. B.** (1964). Dark-adaptation: a new hypothesis. *Vision Research* **4**, 47–58.
- 500 **Bickelmann, C., Morrow, J. M., Müller, J. and Chang, B. S. W.** (2012). Functional  
501 characterization of the rod visual pigment of the echidna (*Tachyglossus aculeatus*), a  
502 basal mammal. *Vis. Neurosci.* **29**, 1–7.
- 503 **Bowmaker, J. K.** (2008). Evolution of vertebrate visual pigments. *Vision Research* **48**,  
504 2022–2041.
- 505 **Calvert, P. D., Strissel, K. J., Schiesser, W. E., Pugh, E. N., Jr and Arshavsky, V. Y.**  
506 (2006). Light-driven translocation of signaling proteins in vertebrate photoreceptors.  
507 *Trends in Cell Biology* **16**, 560–568.
- 508 **Caprette, C. L.** (2005). Conquering the Cold Shudder: The Origin and Evolution of  
509 Snake Eyes. 1–122.
- 510 **Carvalho, L. S., Davies, W. L., Robinson, P. R. and Hunt, D. M.** (2011). Spectral  
511 tuning and evolution of primate short-wavelength-sensitive visual pigments. *Proc.*  
512 *Biol. Sci.* **279**, rspb20110782–393.
- 513 **Chen, J., Wu, M., Sezate, S. A. and McGinnis, J. F.** (2007). Light Threshold–  
514 Controlled Cone  $\alpha$ -Transducin Translocation. *Invest. Ophthalmol. Vis. Sci.* **48**, 3350–  
515 6.

- 516 **Chen, M.-H., Kuemmel, C., Birge, R. R. and Knox, B. E.** (2012). Rapid Release of  
517 Retinal from a Cone Visual Pigment following Photoactivation. *Biochemistry* **51**,  
518 4117–4125.
- 519 **Cortesi, F., Musilová, Z., Stieb, S. M., Hart, N. S., Siebeck, U. E., Malmstrøm, M.,**  
520 **Tørresen, O. K., Jentoft, S., Cheney, K. L., Marshall, N. J., et al.** (2015).  
521 Ancestral duplications and highly dynamic opsin gene evolution in percomorph  
522 fishes. *Proc. Natl. Acad. Sci. U.S.A.* **112**, 1493–1498.
- 523 **Crescitelli, F.** (1956). The nature of the gecko visual pigment. *J. Gen. Physiol.* **40**, 217–  
524 231.
- 525 **Dartnall, H.** (1968). The photosensitivities of visual pigments in the presence of  
526 hydroxylamine. *Vision Research* **8**, 339–358.
- 527 **Das, J., Crouch, R. K., Ma, J.-X., Oprian, D. D. and Kono, M.** (2004). Role of the 9-  
528 Methyl Group of Retinal in Cone Visual Pigments †. *Biochemistry* **43**, 5532–5538.
- 529 **Das, S. R., Bhardwaj, N., Kjeldbye, H. and Gouras, P.** (1992). Muller cells of chicken  
530 retina synthesize 11-cis-retinol. *Biochem J* **285 ( Pt 3)**, 907–913.
- 531 **Davies, W. L., Cowing, J. A., Bowmaker, J. K., Carvalho, L. S., Gower, D. J. and**  
532 **Hunt, D. M.** (2009). Shedding Light on Serpent Sight: The Visual Pigments of  
533 Henophidian Snakes. *Journal of Neuroscience* **29**, 7519–7525.
- 534 **Diller, L. V. and Wallace, R. L.** (1996). Comparative ecology of two snake species  
535 (*Crotalus viridis* and *Pituophis melanoleucus*) in Southwestern Idaho. *Herpetologica*  
536 **52**, 343–360.
- 537 **Dodt, E. and Walther, J. B.** (1958). [*Spectral sensitivity and the threshold of gecko*  
538 *eyes; electroretinographical studies on Hemidactylus turcicus & Tarentola*  
539 *mauritanica.*]. *Pflugers Archiv: European journal of ....*
- 540 **Drummond, H.** (1985). The role of vision in the predatory behaviour of natricine snakes.  
541 *Animal Behaviour* **33**, 206–215.

- 542 **Dungan, S. Z., Kosyakov, A. and Chang, B. S. W.** (2016). Spectral Tuning of Killer  
543 Whale (*Orcinus orca*) Rhodopsin: Evidence for Positive Selection and Functional  
544 Adaptation in a Cetacean Visual Pigment. *Mol. Biol. Evol.* **33**, 323–336.
- 545 **Edgar, R. C.** (2004). MUSCLE: multiple sequence alignment with high accuracy and  
546 high throughput. *Nucleic Acids Res* **32**, 1792–1797.
- 547 **Elias, R. V., Sezate, S. S., Cao, W. and McGinnis, J. F.** (2004). Temporal kinetics of  
548 the light/dark translocation and compartmentation of arrestin and alpha-transducin in  
549 mouse photoreceptor cells. *Mol. Vis.* **10**, 672–681.
- 550 **Fekete, D. M. and Barnstable, C. J.** (1983). The subcellular localization of rat  
551 photoreceptor-specific antigens. *J. Neurocytol.* **12**, 785–803.
- 552 **Gerald, G. W., Bailey, M. A. and Holmes, J. N.** (2006). Movements and activity range  
553 sizes of Northern Pinesnakes (*Pituophis melanoleucus melanoleucus*) in Middle  
554 Tennessee. *Journal of herpetology* **40**, 503–510.
- 555 **Govardovskii, V. I., FYHRQUIST, N., REUTER, T., KUZMIN, D. G. and Donner,**  
556 **K.** (2000). In search of the visual pigment template. *Vis. Neurosci.* **17**, 509–528.
- 557 **Harosi, F. I. and Novales Flamarique, I.** (2012). Functional significance of the taper of  
558 vertebrate cone photoreceptors. *J. Gen. Physiol.* **139**, 159–187.
- 559 **Hart, N. S., Coimbra, J. P., COLLIN, S. P. and Westhoff, G.** (2012). Photoreceptor  
560 types, visual pigments, and topographic specializations in the retinas of hydrophiid  
561 sea snakes. *J. Comp. Neurol.* **520**, 1246–1261.
- 562 **Hauser, F. E., van Hazel, I. and Chang, B. S. W.** (2014). Spectral tuning in vertebrate  
563 short wavelength-sensitive 1 (SWS1) visual pigments: Can wavelength sensitivity be  
564 inferred from sequence data? *J. Exp. Zool. B Mol. Dev. Evol.* **322**, 529–539.
- 565 **Heesy, C. P. and Ross, C. F.** (2001). Evolution of activity patterns and chromatic vision  
566 in primates: morphometrics, genetics and cladistics. *Journal of Human Evolution* **40**,  
567 111–149.

- 568 **Hicks, D. and Barnstable, C. J.** (1987). Different rhodopsin monoclonal antibodies  
569 reveal different binding patterns on developing and adult rat retina. *Journal of*  
570 *Histochemistry & Cytochemistry* **35**, 1317–1328.
- 571 **Himes, J. G.** (2001). Burrowing ecology of the rare and elusive Louisiana pine snake,  
572 *Pituophis ruthveni* (Serpentes : Colubridae). *Amphibia-Reptilia* **22**, 91–101.
- 573 **Imai, H., Kojima, D., Oura, T., Tachibanaki, S., Terakita, A. and Shichida, Y.**  
574 (1997). Single amino acid residue as a functional determinant of rod and cone visual  
575 pigments. *Proc. Natl. Acad. Sci. U.S.A.* **94**, 2322–2326.
- 576 **Imai, H., Kuwayama, S., Onishi, A., Morizumi, T., Chisaka, O. and Shichida, Y.**  
577 (2005). Molecular properties of rod and cone visual pigments from purified chicken  
578 cone pigments to mouse rhodopsin in situ. *Photochem. Photobiol. Sci.* **4**, 667–8.
- 579 **Jacobs, G. H., Fenwick, J. A., Crognale, M. A. and Deegan, J. F., II** (1992). The all-  
580 cone retina of the garter snake: spectral mechanisms and photopigment. *J. Comp.*  
581 *Physiol. A Neuroethol. Sens. Neural. Behav. Physiol.* **170**, 701–707.
- 582 **Karnik, S. S. and Khorana, H. G.** (1990). Assembly of functional rhodopsin requires a  
583 disulfide bond between cysteine residues 110 and 187. *J Biol Chem* **265**, 17520–  
584 17524.
- 585 **Karnik, S. S., Sakmar, T. P., Chen, H. B. and Khorana, H. G.** (1988). Cysteine  
586 residues 110 and 187 are essential for the formation of correct structure in bovine  
587 rhodopsin. *Proc. Natl. Acad. Sci. U.S.A.* **85**, 8459–8463.
- 588 **Kawamura, S. and Yokoyama, S.** (1998). Functional characterization of visual and  
589 nonvisual pigments of American chameleon (*Anolis carolinensis*). *Vision Research*  
590 **38**, 37–44.
- 591 **Kito, Y., Suzuki, T., Azuma, M. and Sekoguti, Y.** (1968). Absorption spectrum of  
592 rhodopsin denatured with acid. *Nature* **218**, 955–957.
- 593 **Kojima, D., Okano, T., Fukada, Y., Shichida, Y., Yoshizawa, T. and Ebrey, T. G.**

- 594 (1992). Cone visual pigments are present in gecko rod cells. *Proc. Natl. Acad. Sci.*  
595 *U.S.A.* **89**, 6841–6845.
- 596 **Kolb, H., Nelson, R., Fernandez, E. and Jones, B. eds.** *Webvision*.
- 597 **Kuwayama, S., Imai, H., Hirano, T., Terakita, A. and Shichida, Y.** (2002). *Conserved*  
598 *Proline Residue at Position 189 in Cone Visual Pigments as a Determinant of*  
599 *Molecular Properties Different from Rhodopsins†*. American Chemical Society.
- 600 **Lamb, T. D.** (2013). Progress in Retinal and Eye Research. *Prog Retin Eye Res* **36**, 52–  
601 119.
- 602 **Larhammar, D., Nordström, K. and Larsson, T. A.** (2009). Evolution of vertebrate rod  
603 and cone phototransduction genes. *Philos. Trans. R. Soc. Lond., B, Biol. Sci.* **364**,  
604 2867–2880.
- 605 **Ma, J. X., Kono, M., Xu, L., Das, J., Ryan, J. C., Hazard, E. S., Oprian, D. D. and**  
606 **Crouch, R. K.** (2001). Salamander UV cone pigment: sequence, expression, and  
607 spectral properties. *Vis. Neurosci.* **18**, 393–399.
- 608 **Makino, C. L., Wen, X.-H., Michaud, N. A., Covington, H. I., DiBenedetto, E.,**  
609 **Hamm, H. E., Lem, J. and Caruso, G.** (2012). Rhodopsin Expression Level Affects  
610 Rod Outer Segment Morphology and Photoresponse Kinetics. *PLoS ONE* **7**, e37832–  
611 7.
- 612 **McDevitt, D. S., Brahma, S. K., Jeanny, J.-C. and Hicks, D.** (1993). Presence and  
613 foveal enrichment of rod opsin in the “all cone” retina of the American chameleon.  
614 *The Anatomical Record* **237**, 299–307.
- 615 **McKibbin, C., Toye, A. M., Reeves, P. J., Khorana, H. G., Edwards, P. C., Villa, C.**  
616 **and Booth, P. J.** (2007). Opsin stability and folding: The role of Cys185 and  
617 abnormal disulfide bond formation in the intradiscal domain. *Journal of Molecular*  
618 *Biology* **374**, 1309–1318.
- 619 **Morrow, J. M. and Chang, B. S. W.** (2015). Comparative Mutagenesis Studies of

- 620 Retinal Release in Light-Activated Zebrafish Rhodopsin Using Fluorescence  
621 Spectroscopy. *Biochemistry* **54**, 4507–4518.
- 622 **Morrow, J. M. and Chang, B. S. W.** (2010). The p1D4-hrGFP II expression vector: a  
623 tool for expressing and purifying visual pigments and other G protein-coupled  
624 receptors. *Plasmid* **64**, 162–169.
- 625 **Morrow, J. M., Lazic, S. and Chang, B. S. W.** (2011). A novel rhodopsin-like gene  
626 expressed in zebrafish retina. *Vis. Neurosci.* **28**, 325–335.
- 627 **Osborne, N. N., Safa, R. and Nash, M. S.** (1999). Photoreceptors are preferentially  
628 affected in the rat retina following permanent occlusion of the carotid arteries. *Vision*  
629 *Research* **39**, 3995–4002.
- 630 **Palczewski, K., Kumasaka, T., Hori, T., Behnke, C. A., Motoshima, H., Fox, B. A.,**  
631 **Le Trong, I., Teller, D. C., Okada, T., Stenkamp, R. E., et al.** (2000). Crystal  
632 structure of rhodopsin: A G protein-coupled receptor. *Science* **289**, 739–745.
- 633 **Piechnick, R., Ritter, E., Hildebrand, P. W., Ernst, O. P., Scheerer, P., Hofmann, K.**  
634 **P. and Heck, M.** (2012). Effect of channel mutations on the uptake and release of the  
635 retinal ligand in opsin. *Proc. Natl. Acad. Sci. U.S.A.* **109**, 5247–5252.
- 636 **Rakshit, T. and Park, P. S. H.** (2015). Impact of Reduced Rhodopsin Expression on the  
637 Structure of Rod Outer Segment Disc Membranes. *Biochemistry* **54**, 2885–2894.
- 638 **Ronquist, F. and Huelsenbeck, J. P.** (2003). MrBayes 3: Bayesian phylogenetic  
639 inference under mixed models. *Bioinformatics* **19**, 1572–1574.
- 640 **Rosenzweig, D. H., Nair, K. S., Wei, J., Wang, Q., Garwin, G., Saari, J. C., Chen, C.**  
641 **K., Smrcka, A. V., Swaroop, A., Lem, J., et al.** (2007). Subunit Dissociation and  
642 Diffusion Determine the Subcellular Localization of Rod and Cone Transducins.  
643 *Journal of Neuroscience* **27**, 5484–5494.
- 644 **Röll, B.** (2001). Gecko vision - retinal organization, foveae and implications for  
645 binocular vision. *Vision Research* **41**, 2043–2056.



- 646 **Sakami, S., Kolesnikov, A. V., Kefalov, V. J. and Palczewski, K.** (2014). P23H opsin  
647 knock-in mice reveal a novel step in retinal rod disc morphogenesis. *Hum. Mol.*  
648 *Genet.* **23**, 1723–1741.
- 649 **Sakmar, T. P., Franke, R. R. and Khorana, H. G.** (1989). Glutamic acid-113 serves as  
650 the retinylidene Schiff base counterion in bovine rhodopsin. *Proc. Natl. Acad. Sci.*  
651 *U.S.A.* **86**, 8309–8313.
- 652 **Sakmar, T. P., Menon, S. T., Marin, E. P. and Awad, E. S.** (2002). Rhodopsin:  
653 insights from recent structural studies. *Annu Rev Biophys Biomol Struct* **31**, 443–484.
- 654 **Sakurai, K., Onishi, A., Imai, H., Chisaka, O., Ueda, Y., Usukura, J., Nakatani, K.**  
655 **and Shichida, Y.** (2007). Physiological properties of rod photoreceptor cells in  
656 green-sensitive cone pigment knock-in mice. *J. Gen. Physiol.* **130**, 21–40.
- 657 **Schott, R. K., Müller, J., Yang, C. G. Y., Bhattacharyya, N., Chan, N., Xu, M.,**  
658 **Morrow, J. M., Ghenu, A.-H., Loew, E. R., Tropepe, V., et al.** (2016).  
659 Evolutionary transformation of rod photoreceptors in the all-cone retina of a diurnal  
660 garter snake. *Proc Natl Acad Sci USA* **113**, 356–361.
- 661 **Sillman, A. J., Govardovskii, V. I., Röhlich, P., Southard, J. A. and Loew, E. R.**  
662 (1997). The photoreceptors and visual pigments of the garter snake (*Thamnophis*  
663 *sirtalis*): a microspectrophotometric, scanning electron microscopic and  
664 immunocytochemical study. *J Comp Physiol A* **181**, 89–101.
- 665 **Sillman, A. J., Johnson, J. L. and Loew, E. R.** (2001). Retinal photoreceptors and  
666 visual pigments in *Boa constrictor imperator*. *J. Exp. Zool.* **290**, 359–365.
- 667 **Simões, B. F., Sampaio, F. L., Jared, C., Antoniazzi, M. M., Loew, E. R., Bowmaker,**  
668 **J. K., Rodriguez, A., Hart, N. S., Hunt, D. M., Partridge, J. C., et al.** (2015).  
669 Visual system evolution and the nature of the ancestral snake. *J. Evol. Biol.* **28**,  
670 1309–1320.
- 671 **Simões, B. F., Sampaio, F. L., Loew, E. R., Sanders, K. L., Fisher, R. N., Hart, N. S.,**  
672 **Hunt, D. M., Partridge, J. C. and Gower, D. J.** (2016). Multiple rod–cone and

- 673 cone-rod photoreceptor transmutations in snakes: evidence from visual opsin gene  
674 expression. *Proc. Biol. Sci.* **283**, 20152624–8.
- 675 **Starace, D. M. and Knox, B. E.** (1997). Activation of transducin by a *Xenopus* short  
676 wavelength visual pigment. *J Biol Chem* **272**, 1095–1100.
- 677 **Stull, O. G.** (1940). *Variations and Relationship in the Snake of the Genus Pituophis,*  
678 *United States.. National Museum. Washington, DC.* Smithsonian Institution. Bulletin.
- 679 **Taniguchi, Y., Hisatomi, O., Yoshida, M. and Tokunaga, F.** (1999). Evolution of  
680 visual pigments in geckos. *FEBS Lett.* **445**, 36–40.
- 681 **Tansley, K.** (1959). The retina of two nocturnal geckos *Hemidactylus turcicus* and  
682 *Tarentola mauritanica*. *Pflügers Archiv* **268**, 213–220.
- 683 **Tansley, K.** (1961). The retina of a diurnal gecko, *Phelsuma madagascariensis*  
684 *longinsulae*. *Pflugers Arch Gesamte Physiol Menschen Tiere* **272**, 262–269.
- 685 **Tansley, K.** (1964). The gecko retina. *Vision Research* **4**, 33–IN14.
- 686 **van Hazel, I., Dungan, S. Z., Hauser, F. E., Morrow, J. M., Endler, J. A. and Chang,**  
687 **B. S. W.** (2016). A comparative study of rhodopsin function in the great bowerbird  
688 (*Ptilonorhynchus nuchalis*): Spectral tuning and light-activated kinetics. *Protein*  
689 *Science* n/a–n/a.
- 690 **van Hazel, I., Sabouhanian, A., Day, L., Endler, J. A. and Chang, B. S. W.** (2013).  
691 Functional characterization of spectral tuning mechanisms in the great bowerbird  
692 short-wavelength sensitive visual pigment (SWS1), and the origins of UV/violet  
693 vision in passerines and parrots. *BMC Evol. Biol.* **13**, 250.
- 694 **Wald, G., Brown, P. K. and Smith, P. H.** (1955). Iodopsin. *J. Gen. Physiol.*
- 695 **Walls, G. L.** (1942). *The vertebrate eye and its adaptive radiation [by] Gordon Lynn*  
696 *Walls.* Bloomfield Hills, Mich.,: Cranbrook Institute of Science.
- 697 **Wen, X.-H., Shen, L., Brush, R. S., Michaud, N., Al-Ubaidi, M. R., Gurevich, V. V.,**

- 698 **Hamm, H. E., Lem, J., DiBenedetto, E., Anderson, R. E., et al.** (2009).  
699 Overexpression of Rhodopsin Alters the Structure and Photoresponse of Rod  
700 Photoreceptors. *Biophys. J.* **96**, 939–950.
- 701 **Yokoyama, S.** (2000). Molecular evolution of vertebrate visual pigments. *Prog Retin Eye*  
702 *Res* **19**, 385–419.
- 703 **Zhang, X., Wensel, T. G. and Yuan, C.** (2006). Tokay Gecko Photoreceptors Achieve  
704 Rod-Like Physiology with Cone-Like Proteins†. *Photochem. Photobiol.* **82**, 1452.

705 **Figure captions:**

706 **Figure 1:** Immunohistochemical staining of control (mouse, **A-C**) and pine snake (**D-F**)  
707 transverse retinal cryosections with rhodopsin (RET-P1) and rod-specific-transducin  
708 (K20) antibodies. Rhodopsin is found in a subset of cone-like photoreceptors localized to  
709 the outer segment (**D**). Rod-specific transducin is also found in the same photoreceptor,  
710 primarily to the inner segment (**E**). Double staining indicates that both rhodopsin and rod-  
711 specific transducin are found within the same cell (**F**). Nuclei are shown in blue,  
712 rhodopsin in red, and rod-specific transducin in green. Scale bars = 20  $\mu\text{m}$ .

713

714 **Figure 2:** UV-visible dark absorption spectra of pine snake opsins. (**A**) Bovine wildtype  
715 rhodopsin was used as a control for expressions. Dark spectra for pine snake (**B**)  
716 rhodopsin (**C**) SWS1 and (**D**) LWS. Inset in (**A**), (**B**), and (**D**) is the dark-light spectra.  
717 Inset in (**C**) is the dark-acid bleach spectrum.  $\lambda_{\text{max}}$  estimations are shown for each  
718 pigment.

719

720 **Figure 3:** Hydroxylamine reactivity of pine snake (**A**) LWS and (**B**) RH1 pigments and  
721 (**C**) bovine rhodopsin. Absorption values of the dark  $\lambda_{\text{max}}$  peak decrease over time (open  
722 circles), while absorption of the retinal oxime at 360nm increase over time (solid circles).  
723 The half-lives of the reactive opsins were determined via curve fitting exponential rise  
724 and decay equations to data.

725

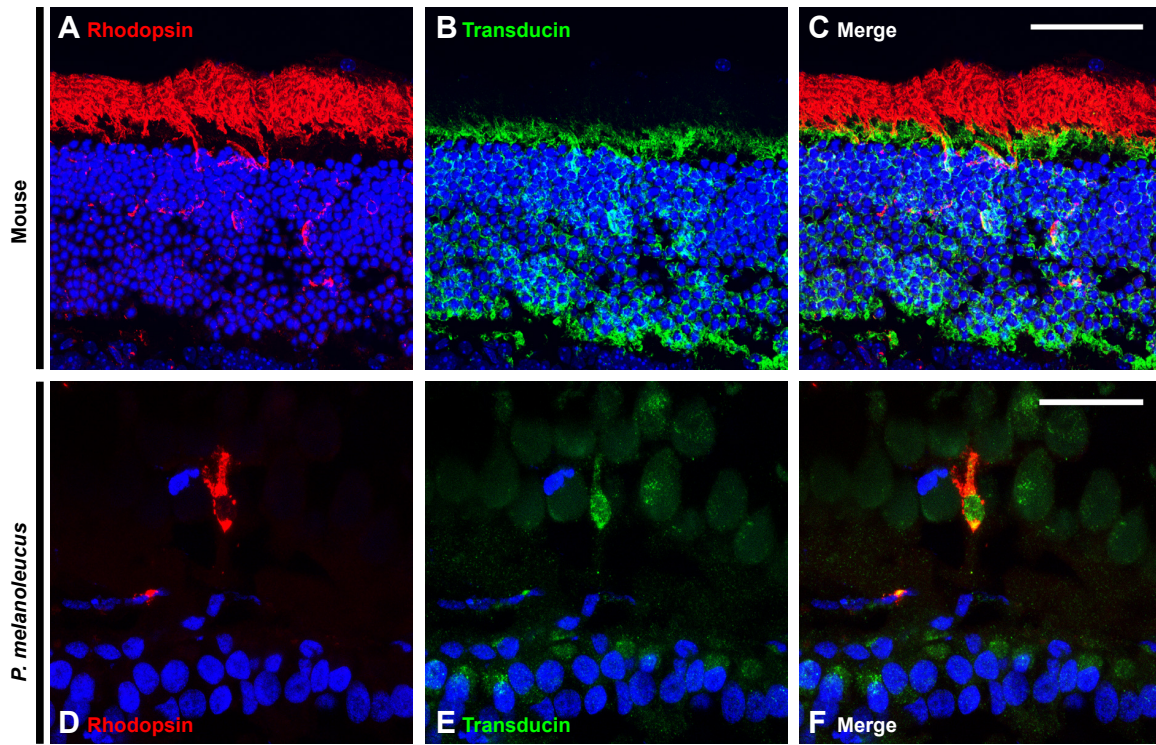

726

727 Figure 1

728

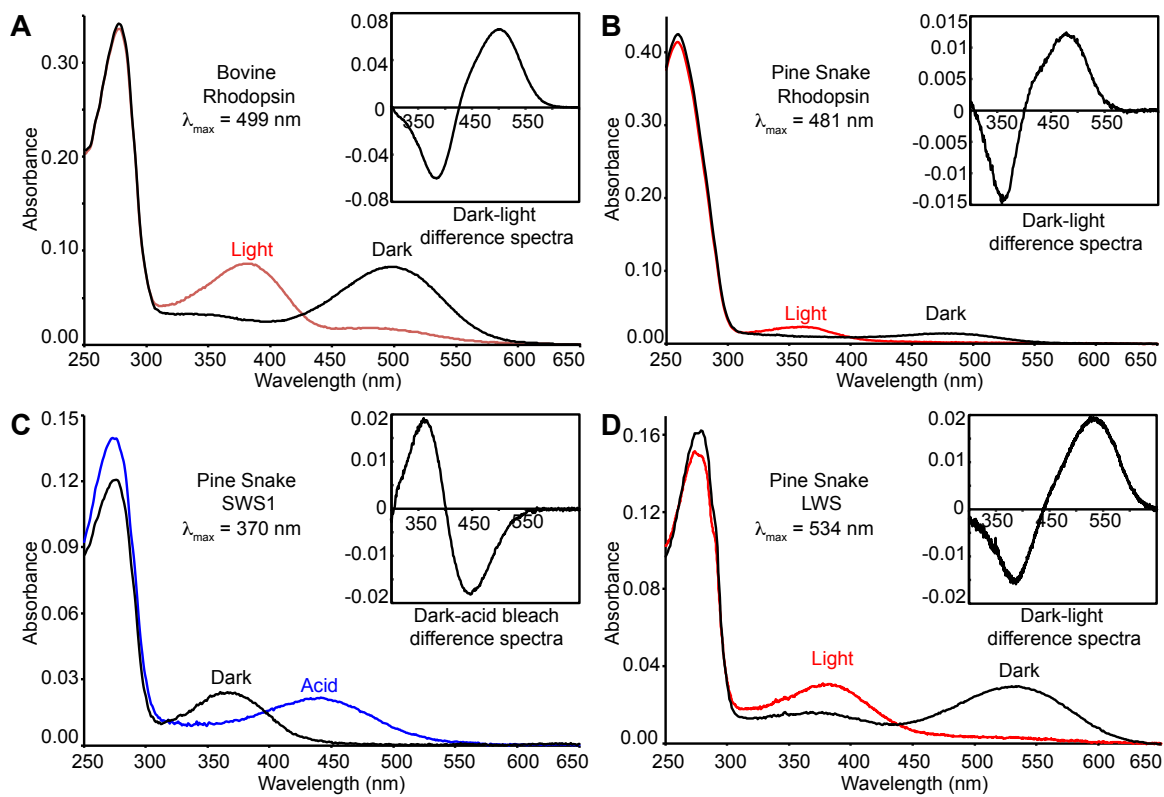

729

730 Figure 2

731

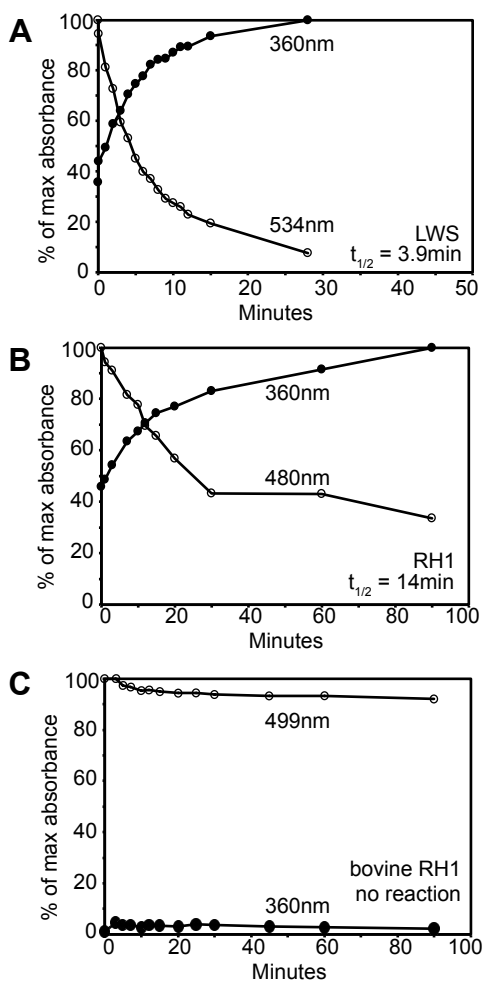

732

733 Figure 3

734
